# Supplementary material
Source: Copernicus journal article supplement (doi:10.5194/egusphere-2026-1454)
Supplement: Supplementary file 1 [file egusphere-2026-1454-supplement.pdf]

1 **Supplementary Information**

2 **For**

3 **FRAME v1.0: Advancing Fire Risk Assessment in Tropical Fragmented Forests with a**  
4 **Machine Learning Environment**

5 *Barik, Anasuya <sup>[1]\*</sup>; Baidya Roy, Somnath <sup>[1]</sup>*

6 <sup>[1]</sup> *Indian Institute of Technology Delhi, Hauz Khas, New Delhi, India*

7 *\* Correspondence to: Anasuya Barik (Anasuya.Barik@cas.iitd.ac.in)*

8  
9 **Annexure 1: Spin-up of intermediate indices**

10  
11 The FFMC, DMC and DC of a particular day depend on the values of these indices in the previous day. Typically the  
12 first day of the simulation is started by initializing the FFMC, DMC and DC with the default values of 85, 6 and 15  
13 respectively. Since the typical values of these indices are much higher in the tropical regions, we performed 12  
14 experiments in three sets to determine the time required by the system to produce stable values of FFMC, DMC and DC.  
15 All of these experiments were of a three-year duration wherein different combinations of initialization values of FFMC,  
16 DMC and DC were provided to the 1st January of the first year. In the second and third years, the simulated values of  
17 FFMC, DMC and DC of 31st December in the previous year were provided as initialization. We provided the model with  
18 daily climatology values of meteorological inputs for all years. In the first set of experiments, the code was initialized  
19 with FFMC values of 75, 80, 85 and 90. The DMC and DC were initialized with the default values of 6 and 15. In the  
20 second set, we initialized the FFMC and DC with default values and varied the DMC initialization with values 6, 50, 100,  
21 and 150. In the third set, DC initialization was varied with values 15, 50, 100, and 150.

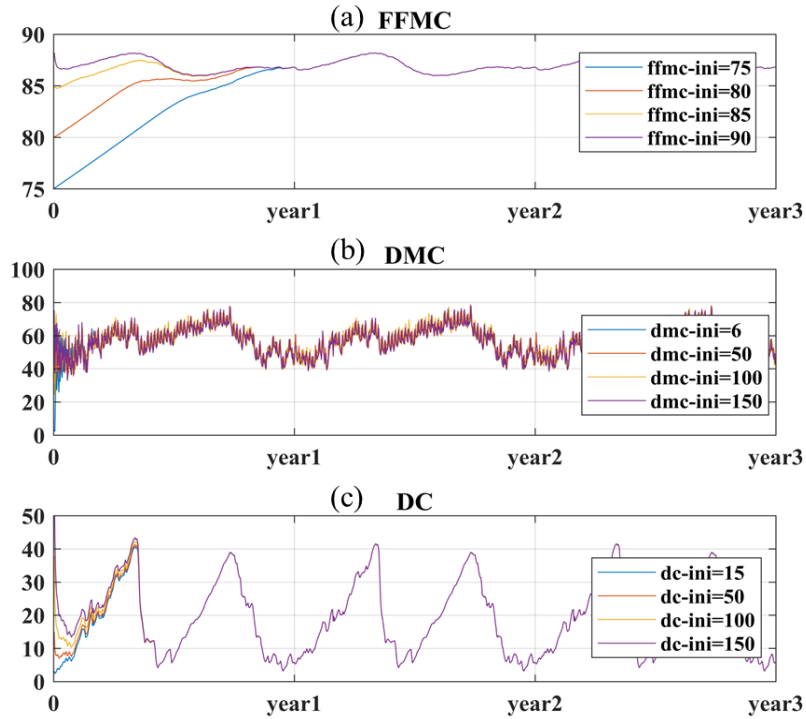

(Figure S1: Spin-up simulation for (a) FFMC, (b) DMC, and (c) DC)

23  
 24  
 25  
 26 In all conducted experiments, we observed that intrannual variability in DMC is the most pronounced, followed by DC,  
 27 with the lowest variability observed in FFMC. From the first set of experiments, we see that irrespective of the  
 28 initialization value of FFMC, the curve stabilizes after year 1 (Figure S1.a). For DMC (Figure S1.b), curves with different  
 29 initialization values start to converge from day 70, although they do not perfectly align. In the case of DC we observe a  
 30 bimodal signature annually and the curves with different DC initializations converge around day 150 of year 1. Overall,  
 31 all the three intermediate indices converge by year 1 leading us to conservatively conclude that the CFFDRS FWI  
 32 consistently produces stable output irrespective of the initial values of FFMC, DMC, and DC. This aligns with the findings  
 33 reported by Barik & Baidya Roy, (2023), even though they utilized different meteorological inputs and a different  
 34 approach to determine the spin-up period. In summary, regardless of the input meteorological dataset and the initial  
 35 values, the CFFDRS should be spun-up for at least a year for reliable outputs.

36  
 37 **Annexure 2: Suitability of CFFDRS for Indian forest regions**

38  
 39 To test if the CFFDRS can be used in Indian forest regions under Indian weather conditions, we compared the responses  
 40 of the system when driven by idealized meteorological drivers and when driven by observed meteorological data. For this  
 41 purpose, we performed sensitivity experiments by gradually increasing values of one meteorological drivers while  
 42 keeping the other drivers at a constant value. These experiments are listed in table 1. For all the three a, b, and c sets, the  
 43 experiments were done for two rainfall conditions, precipitation = 0 mm and precipitation = 10 mm. Because forest fire

44 occurs mostly under dry conditions, we did not use any higher precipitation values. The FWI values from these idealized  
 45 sensitivity experiments were compared to the FWI calculated when the CFFDRS was driven by observed ERA5 data.

46  
 47 For this purpose, the ERA5-driven simulated FWIs were binned into conditions similar to the idealized experiments. For  
 48 example, in experiment set a (i), FWI was computed at pixels having relative humidity in bins such as <20%, 20-40%,  
 49 40-60%, 60-80%, and 80-100%, wind speed 10kmph and no precipitation. Since this experiment tested the variability of  
 50 FWI with temperature, we retained the temperature of these pixels. In this way, the FWI responses from all setups similar  
 51 to ideal experiments were calculated and plotted as functions of the relevant meteorological drivers, and their patterns  
 52 were analyzed. The outcomes of this suitability assessment is described in the results section.

53  
 54

*Table S1: Sensitivity experiments for assessing ideal CFFDRS behaviour*

|                           | <b>2m Temperature</b>     | <b>Relative Humidity</b> | <b>Wind speed</b>      | <b>Precipitation</b> |
|---------------------------|---------------------------|--------------------------|------------------------|----------------------|
| <b>Experiment set (a)</b> | (i) Varying from 0-100°C  | 20, 40, 60, 80, 100%     | 10 kmph                | prec=0               |
|                           | (ii) Varying from 0-100°C | 20, 40, 60, 80, 100%     | 10 kmph                | prec=10 mm           |
| <b>Experiment set (b)</b> | (ii) 10, 20, 30, 40, 50°C | Varying from 0-100%      | 10 kmph                | prec=0               |
|                           | (ii) 10, 20, 30, 40, 50°C | Varying from 0-100%      | 10 kmph                | prec=10 mm           |
| <b>Experiment set (c)</b> | (ii) 10, 20, 30, 40, 50°C | 10%                      | Varying from 0-50 kmph | prec=0               |
|                           | (ii) 10, 20, 30, 40, 50°C | 10%                      | Varying from 0-50 kmph | prec=10 mm           |

55  
 56 The families of curves (Figure S2) representing the idealized behaviour of the FWI model depict the impacts of varying  
 57 weather parameters on FWI. The figure shows that FWI increases with an increase in temperature and wind speed but  
 58 decreases with increasing relative humidity (Figure 4 i(a), i(b), i(c), iii(a), iii(b), iii(c)). A warm atmosphere helps ignite  
 59 and burn fuel faster as less heat energy would be used to raise the fuels to their ignition temperature (Flannigan et al.,  
 60 2000; Wotton & Flannigan, 1993). At lower relative humidity, we see a steeper curve of FWI increasing with increasing  
 61 temperature. The temperature rise also contributes to a decrease in relative humidity, hence the FWI is affected by the  
 62 individual variables as well as their interdependence (Countryman, 1972). Unshaded fuels experiencing warmer and drier  
 63 atmospheres are more susceptible to causing more intense fires if ignited (Scheiter et al., 2015). At very high relative  
 64 humidity or when precipitation occurs, the available fuel becomes saturated with moisture (Dimitrakopoulos &  
 65 Papaioannou, 2001) and under such conditions, FWI is very low and does not change with any change in temperature.  
 66 With steadily increasing relative humidity, the evaporation rate of moisture from the fuel surface is affected thus  
 67 increasing the fuel moisture and decreasing FWI values. Drier atmospheres lead to a fire favourable conditions in which  
 68 a fire is likely to ignite easily and burn more vigorously (Cruz et al., 2012). Wind speed primarily affects the FFMC and

69 ISI indices (Arnell et al., 2021; Field, 2020). Increased wind leads to more evaporation from damp surfaces by carrying  
 70 away moist air and bringing in dryer air. When the fire is ignited, the wind increases the supply of oxygen and facilitates  
 71 the combustion process (Santoso et al., 2019). In the ideal experiments, it was observed that with uniformly increasing  
 72 wind speed, FWI increases, and warmer and drier conditions increase the slope of this variation. These characteristic  
 73 patterns were observed even when the FWI was computed with ERA5 forcing over India (Figure S2 column (ii) and (iv)).  
 74

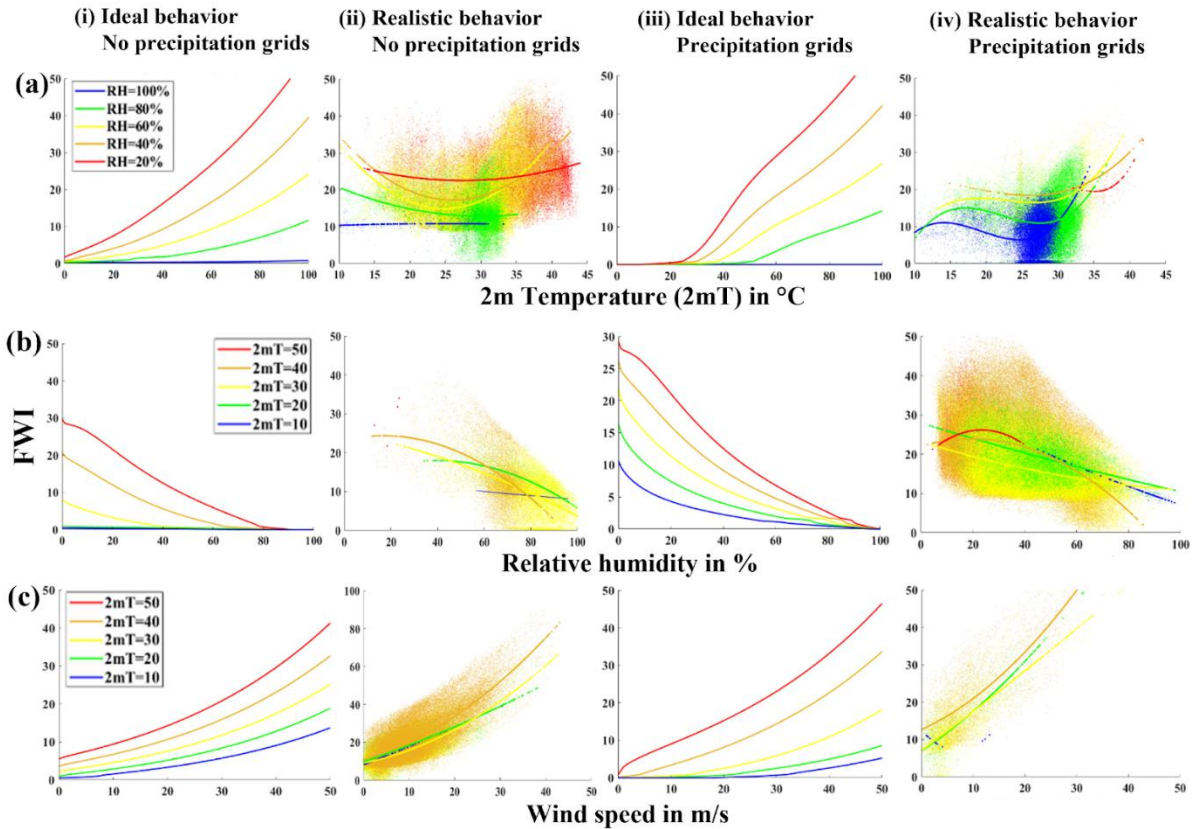

75  
 76 *Figure S2: Idealistic (i and iii) and realistic (ii and iv) model performance with Indian Climate for varying (a)*  
 77 *temperature, (b) relative humidity, and (c) wind speed for (i and ii) no precipitation grids and (iii and iv) precipitation*  
 78 *occurring grids respectively.*

79  
 80 **Annexure 3: Methods to calculate FWI thresholds for fire danger classes**

81  
 82 1. Percentile based

83 Following Barik & Baidya Roy, (2023) and a method used by the U.S. Forestry Services, we first considered thresholds  
 84 of 22nd, 45th, 90, and 97th percentile FWI as the upper threshold values for Low, Medium, High, and Very high danger  
 85 classes respectively. Then to further refine these thresholds we plotted the Receiver Operating Characteristics (ROC)  
 86 curve in these intervals. ROC curve is a tool used to find out the best classifier in categorical problems (Figure S3(a)). In  
 87 a given interval, it plots a curve between the True Positive Rate (TPR) and the False Positive Rate (FPR) at varying  
 88 decision thresholds. The point in the curve closest to the (1,0) point marks the best operating point. In this case, we first

89 selected the interval between 0th and 22nd percentile. Considering all consecutive values between 0-22 as the decision  
90 threshold, we plotted the ROC curve and determined the best operating point which was closest to (1,0) point. This was  
91 the threshold value of that interval. This process was then repeated for the other intervals and all the zones. Thus, instead  
92 of the threshold values at the 22nd, 45th, 90th, and 97th percentile, we selected the best classifier percentile values in that  
93 interval using the ROC curve.

94  
95 2. Percentage of fire events based  
96 In this method, we computed the percentage of fires occurring beyond every percentile index (PI) of FWI and applied  
97 hierarchical clustering to classify the dataset into 5 clusters. Hierarchical clustering (Nielsen, 2016) is an unsupervised  
98 learning method that is used to divide data points based on similarity in attributes and patterns. Here, we have used  
99 agglomerative hierarchical clustering, where data points start as individual clusters and are successively merged to form  
100 larger clusters. Hierarchical clustering is implemented by calculating distances between data points, which in our case is  
101 the percentage of fires corresponding to each PI. Then it iteratively merges clusters based on these distances. The process  
102 continues until a desired level of detail or structure is achieved. We computed the highest percentage of fires in the 5  
103 clusters and computed the corresponding FWI and PI as thresholds for each class (Figure S3(b)).

104  
105 3. Logistic regression based  
106 Logistic regression is another method that computes the probability of occurrence in problems with two possible outcomes  
107 (DeMaris, 1995). In this study, we use logistic regression to model the likelihood of fire occurrence at the daily scale.  
108 The outcome variable is binary, where a grid cell is assigned a value of 1 if a fire occurred on a given day and 0 otherwise.  
109 Barik & Baidya Roy, (2023) considered 0.2, 0.5, 0.7 and 0.9 as the danger class thresholds. As these threshold values  
110 were subjective in nature, to make the thresholds more robust, we used hierarchical clustering. We first fitted a binomial  
111 logistic regression model to our combined fire-presence and fire-absence observations against their corresponding FWI  
112 values. This produced a probability of fire occurrence for each FWI. We then drew a random sample of 1,000 predicted  
113 probabilities and applied hierarchical clustering (Ward's linkage) to group them into five clusters. For each cluster, we  
114 identified the highest probability value and mapped it back to its position in the sorted FWI array. These mapped FWI  
115 values became the thresholds which we overlaid on the logistic sigmoid curve (Figure S3(c)).

116  
117 4. K-means clustering  
118 We used the K-Means clustering method as in Barik & Baidya Roy, (2023). First, we paired each FWI percentile value  
119 with its corresponding fire-count and arranged these as a two-column dataset. We then applied k-means clustering (k =  
120 5, maximum 1,00,000 iterations) to group the data into five clusters. K-means is an unsupervised algorithm that assigns  
121 each point to the nearest cluster centroid and iteratively adjusts centroids to minimize the total within-cluster variance.  
122 After clustering, we sorted the centroids by their FWI coordinate and took these values as the thresholds of the danger  
123 classes. Finally, we overlaid these FWI thresholds on the FWI–fire count per percentile curve (Figure S3d).

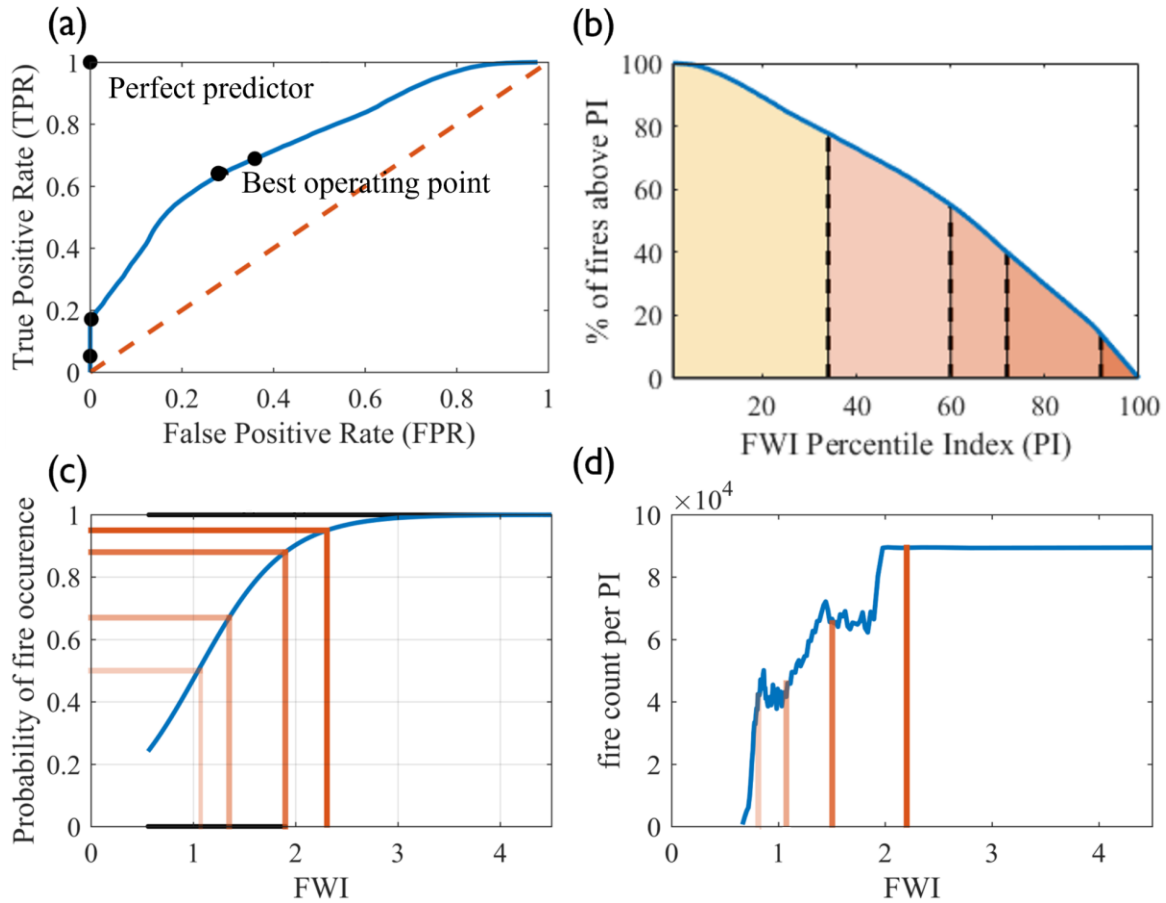

124  
125  
126 *Figure S3: Graphical illustration of (a) ROC curve of the percentile-based method, thresholds in (b) percentage*  
127 *method, (c) logistic regression method, and (d) K-means clustering method in the NE zone. We obtain similar graphs*  
128 *in other zones also.*

130 **Annexure 4: Details on the evaluation of FDRS thresholds**

131 To evaluate the performance of the FDRS thresholds, we analysed various skill metrics and robustness checks. We  
132 ensured that the following three criteria were met:

- 133
- 134 • Minimum/ no overlap between the classes when considering different methods.
  - 135 • Increase in the fire occurrence probability with each class.
  - 136 • Acceptable values of evaluative parameters like critical success rate (CSI; Schaefer, 1990), probability of detection  
137 (hit rate), and false alarm ratio (FAR; Schaefer, 1990), hits due to chance and correct rejection. To assess these  
138 parameters, we considered the Low danger class threshold as a benchmark for the confusion matrices for each zone.  
139 These parameters were calculated using the following equations:

140  
141 1. Critical Success Index (CSI):

142 
$$CSI = \frac{Hits}{Hits + Misses + False\ alarms}$$

143

144 2. Probability of Detection (Hit Rate):

145 
$$Hit\ Rate = \frac{Hits}{Hits + Misses}$$

146

147 3. False Alarm Ratio (FAR):

148 
$$FAR = \frac{False\ alarms}{False\ alarms + Correct\ rejections}$$

149

150 4. Hits due to Chance:

151 
$$Hits\ due\ to\ chance = \frac{Total\ events \times Total\ Hits}{Total\ observation^2}$$

152

153 5. Correct Rejection:

154 
$$Correct\ rejection = \frac{Correct\ rejections}{Correct\ rejections + False\ alarms}$$

155

156

157

158 **Annexure 5:**

159

160 *Table S2: Performance statistics of various machine learning and neural network predictive models to simulate fire*  
 161 *count*

| ML Models              | HIM       |      | NE        |      | CEN       |      | DEC       |      | WG        |      |
|------------------------|-----------|------|-----------|------|-----------|------|-----------|------|-----------|------|
|                        | R-squared | RMSE |
| Interactions linear    | 0.51      | 238  | 0.41      | 1059 | 0.29      | 440  | 0.6       | 331  | 0.25      | 207  |
| Complex tree           | 0.68      | 193  | 0.62      | 849  | 0.65      | 307  | 0.74      | 262  | 0.17      | 211  |
| Fine Gaussian SVM      | 0.33      | 281  | 0.63      | 844  | 0.41      | 399  | 0.47      | 379  | 0.2       | 214  |
| Rational quadratic GPR | 0.71      | 185  | 0.66      | 804  | 0.66      | 303  | 0.78      | 245  | 0.44      | 179  |

|                      |      |     |      |     |      |     |      |     |      |     |
|----------------------|------|-----|------|-----|------|-----|------|-----|------|-----|
| Squared exponential  | 0.73 | 179 | 0.61 | 868 | 0.49 | 373 | 0.79 | 239 | 0.42 | 176 |
| Bagged/boosted trees | 0.76 | 169 | 0.72 | 733 | 0.68 | 295 | 0.77 | 250 | 0.36 | 185 |
| ANN based            | 0.85 | 181 | 0.8  | 877 | 0.73 | 415 | 0.89 | 232 | 0.71 | 167 |

162

163

164

165

166
